# Supplementary material for: A template-assisted strategy to synthesize a dilute CoNi alloy incorporated into ultramicroporous carbon for high performance supercapacitor application
Source: Royal Society of Chemistry journal article supplement (doi:10.1039/c9dt00410f), 2019-01-01
Supplement: c9dt00410f1.pdf [file c9dt00410f1.pdf]

**Electronic Supplementary information**

# Template-assisted strategy to synthesis dilute CoNi alloy incorporated into ultramicroporous carbon for high performance supercapacitors application

Yan Jiang<sup>1</sup>, Yue Wang<sup>1</sup>, Dehong Zeng<sup>1</sup>, Yao Wang<sup>1</sup>, Yangde Ma<sup>1</sup>, Hai Wang<sup>2</sup>, Xin Zhang<sup>1\*</sup>, Xiaoping Dai<sup>1</sup>

<sup>1</sup>State Key Laboratory of Heavy Oil Processing, China University of Petroleum,  
Changping, Beijing 102249, China

<sup>2</sup>National Institute of Metrology, Beijing 100013, P. R. China

**Synthesis of SBA-15:** SBA-15 was synthesized using tri-block copolymer (P123) as a soft template. Typically, 2.0 g P123 was dissolved in 60 mL of 2M HCl and 15 ml of distilled water at 40 °C, and then the mixture was stirred for 1 h. After that, 4.17 mL of tetraethyl orthosilicate (TEOS) was added. The gel composition P123: HCl: H<sub>2</sub>O: TEOS was 0.017: 5.88: 197: 1 in molar ratio. The resulting mixture was further stirred at 40 °C for 5 h, and then transferred into a teflon-lined stainless steel autoclave and aged at 100 °C for 24 h. After cooling down to room temperature, the products were filtered, washed with distilled water repeatedly, and dried overnight at 60 °C in air. The as-synthesized sample was then pyrolyzed in an air flow at 550 °C (heating rate 1 °C min<sup>-1</sup>) and kept under these conditions for 6 h to remove the copolymer template.

**Materials Characterization.** The infrared spectra of samples were recorded in KBr disks using a Nicolet Nexus 870 FT-IR spectrometer. Powder X-ray diffraction (XRD) patterns of the samples were recorded on a Bruker D8-advance X-ray powder diffractometer operated at voltage of 40 kV and current of 40 mA with CuK radiation ( $\lambda = 1.5406 \text{ \AA}$ ). The Raman spectra of samples were recorded with a HORIBA Jobin Yvon HR800 with a microscope attachment. The laser wavelength of 532 nm was focused using a diffraction limited spot, and the scan time was 2 s for each sample. The morphologies of samples were characterized by scanning electron microscope (SEM, FEI-Quanta 200F) at 15 kV and a transmission electron microscope (TEM, JEM-2100F) at 200 kV with an energy-dispersive X-ray spectrometry (EDS) equipment. The TEM images, selected area electron diffractions, high angle annular dark field scanning transmission electron microscopy (HAADF-STEM), line scanning

and mapping of C, Co and Ni elements were analyzed using a Tecnai G2 F20 S-Twin high-resolution transmission electron microscope (HRTEM) operating at 200 kV. N<sub>2</sub> adsorption/desorption isotherms were obtained by a Kubo X10000 static volumetric gas adsorption analyzed at -196 °C. Before measurements, the samples were de-gassed at 300 °C for 3 h in vacuum. The specific surface area was calculated from the adsorption branches in the relative pressure range of 0.05-0.20 by the Brunauer-Emmett-Teller (BET) method. The mesopore size distribution was calculated from desorption branches by the Barret-Joyner-Halenda (BJH) method, and the single point adsorption total pore volume was taken at the relative pressure of 0.96. The micropore volume was calculated by *t*-plot method and the micropore size distribution was estimated by the Horvath-Kawazoe (H-K) method. The total reflection X-ray fluorescence (TXRF) was recorded on a Rigaku at 50 kV and 0.60 mA to measure the actual loading of cobalt and nickel. Hydrogen temperature-programmed reduction (H<sub>2</sub>-TPR) was performed from room temperature to 800 °C using a homemade apparatus equipped with a thermal conductivity detector.

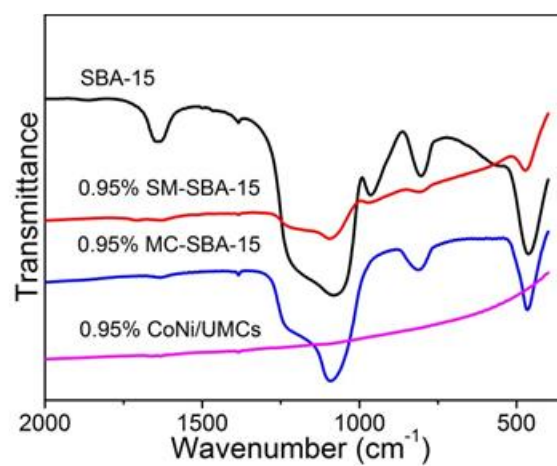

**Figure S1.** FT-IR spectra of SBA-15, 0.95% SM-SBA-15, 0.95% MC-SBA-15 and 0.95% CoNi/UMCs.

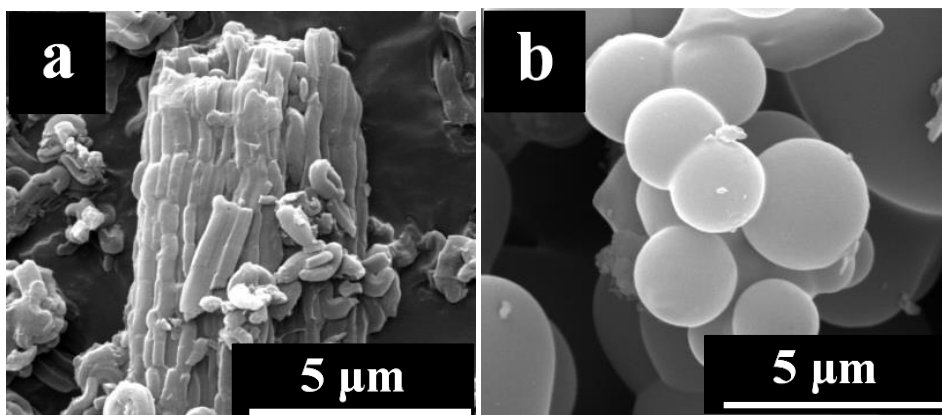

Figure S2 (a) SEM image of 0.95%CoNi/CMK-3, (b) SEM image of 0.95%CoNi/UMCs-2.

**Table S1** The actual mass ratio of Co/C and Ni/C measured by TXRF characterization.

| Samples         | Co(Ac) <sub>2</sub> 4H <sub>2</sub> O <sup>a</sup><br>(mg) | Co/C <sup>b</sup> | Ni(Ac) <sub>2</sub> 4H <sub>2</sub> O <sup>c</sup><br>(mg) | Ni/C <sup>d</sup> |
|-----------------|------------------------------------------------------------|-------------------|------------------------------------------------------------|-------------------|
| UMCs            | 0                                                          | 0                 | 0                                                          | 0                 |
| 0.11% CoNi/UMCs | 16                                                         | 0.11%             | 16                                                         | 0.09%             |
| 0.50% CoNi/UMCs | 20                                                         | 0.50%             | 20                                                         | 0.55%             |
| 0.95% CoNi/UMCs | 24                                                         | 0.95%             | 24                                                         | 0.98%             |
| 1.04% CoNi/UMCs | 32                                                         | 1.04%             | 32                                                         | 1.10%             |

<sup>a</sup> The mass of Co(Ac)<sub>2</sub> 4H<sub>2</sub>O in the process of synthesis CoNi/UMCs composites;

<sup>b</sup> The actual mass ratio of Co/C measured by TXRF characterization;

<sup>c</sup> The mass of Ni(Ac)<sub>2</sub> 4H<sub>2</sub>O in the process of synthesis CoNi/UMCs composites;

<sup>d</sup> The actual mass ratio of Ni/C measured by TXRF characterization.

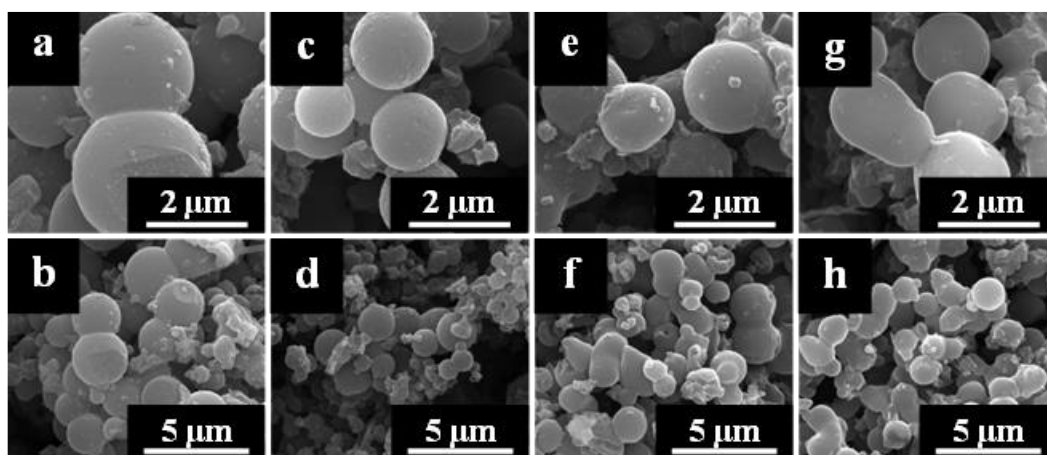

**Figure S3.** SEM images of (a, b) UMCs, (c, d) 0.11% CoNi/UMCs, (e, f) 0.50% CoNi/UMCs, (g, h) 1.04% CoNi/UMCs.

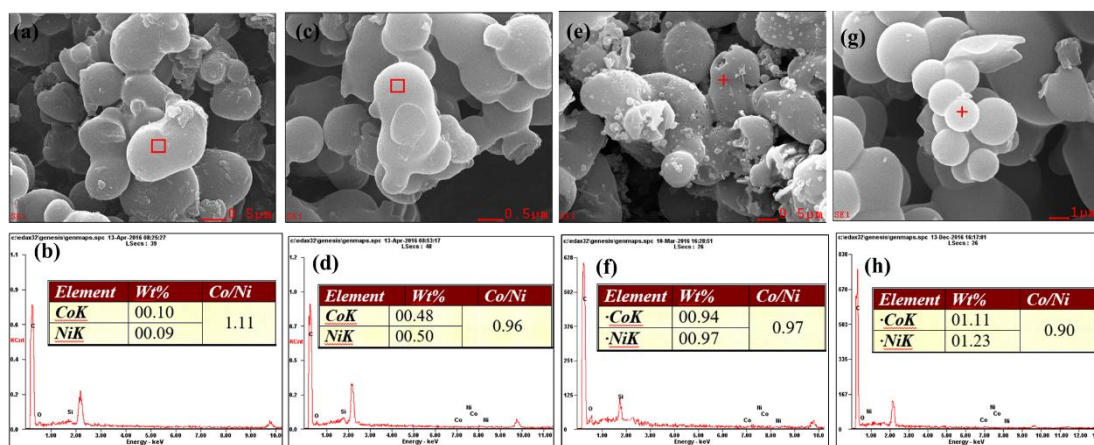

**Figure S4** SEM images and EDX mapping of (a)(b) 0.11%, (c)(d) 0.50%, (e)(f) 0.95%, (g)(h) 1.04% CoNi/UMCs.

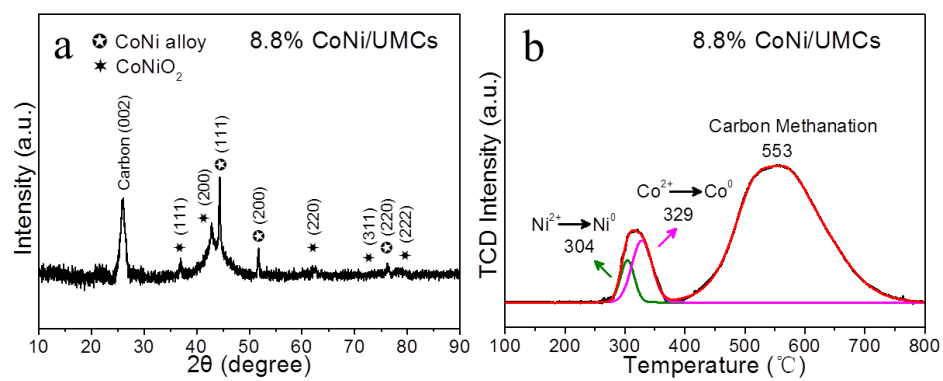

**Figure S5.** (a) XRD patterns, (b)  $\text{H}_2$ -TPR profiles of 8.8% CoNi/UMCs.

**Table S2** The peak temperatures and H<sub>2</sub> consumption of CoNi/UMCs composites.

| Samples         | Peak temperatures<br>( °C) | H <sub>2</sub> consumption<br>(mmol) |
|-----------------|----------------------------|--------------------------------------|
| UMCs            | 648                        | 0.026                                |
| 0.11% CoNi/UMCs | 547                        | 0.016                                |
| 0.50% CoNi/UMCs | 576                        | 0.028                                |
| 0.95% CoNi/UMCs | 590                        | 0.032                                |
| 1.04% CoNi/UMCs | 627                        | 0.029                                |

**Table S3** A comparison of as-prepared 0.95% CoNi/UMCs with other ultramicro-, micro- and mesoporous carbons as electrode materials for EDLCs in aqueous electrolyte.

| Materials               |                 | Specific capacitance ( $\text{F g}^{-1}$ ) |                   |                   |                   | Ref.      |
|-------------------------|-----------------|--------------------------------------------|-------------------|-------------------|-------------------|-----------|
|                         |                 | 0.25                                       | 0.50              | 1.00              | 10                |           |
|                         |                 | $\text{A g}^{-1}$                          | $\text{A g}^{-1}$ | $\text{A g}^{-1}$ | $\text{A g}^{-1}$ |           |
| Ultramicroporous carbon | 0.95% CoNi/UMCs | 268                                        | 251               | 241               | -                 | this work |
|                         | UCNs            | -                                          | 222               | 206               | 156               | 1         |
|                         | PVFC            | -                                          | 218               | 194               | 133               | 2         |
|                         | UCM-1           | -                                          | ~ 300             | -                 | -                 | 3         |
|                         | UMCN-60         | -                                          | 411               | -                 | 238               | 4         |
| Microporous carbons     | C800            | ~ 200                                      | -                 | -                 | -                 | 5         |
|                         | NPC             | 258                                        | -                 | -                 | -                 | 6         |
| Mesoporous carbons      | CMK-3           | -                                          | -                 | 210               | 126               | 7         |
|                         | FDU-15          | -                                          | 130               | 119               | 100               | 8         |
|                         | MC-1            | -                                          | 208               | -                 | ~ 170             | 9         |
|                         | HPC-bdc         | 170                                        | -                 | -                 | -                 | 10        |

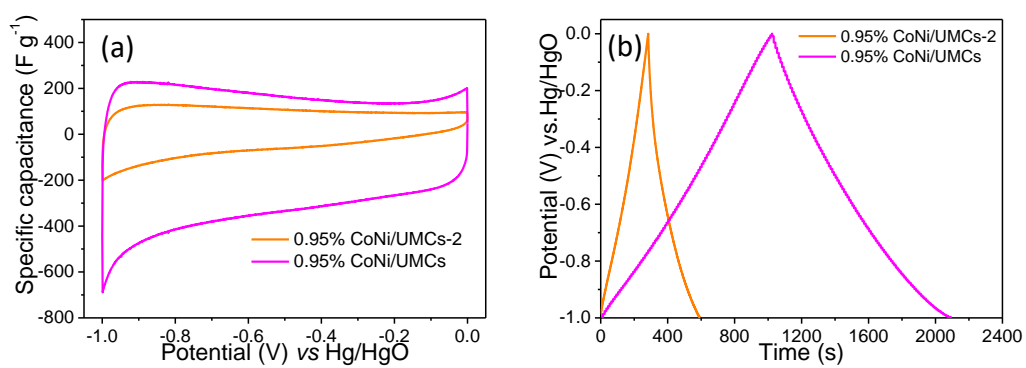

**Figure S6.** Capacitive performance: (a) CV curves at  $1 \text{ mV s}^{-1}$  and (b) GCD curves at  $0.25 \text{ A g}^{-1}$  of 0.95% CoNi/UMCs-2 and 0.95% CoNi/UMCs.

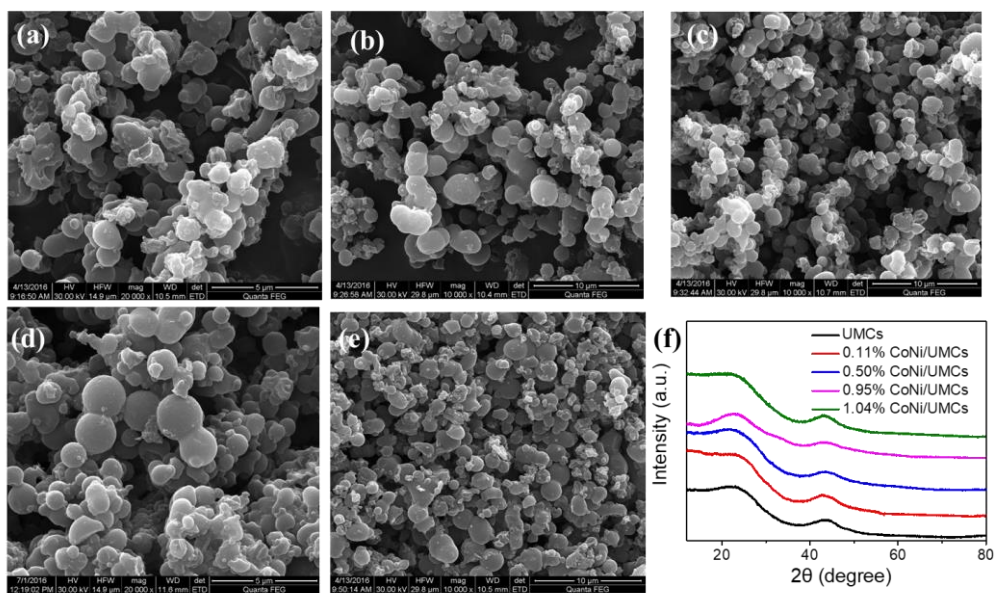

**Figure S7** SEM images of (a) UMCs, (b) 0.11%, (c) 0.50%, (d) 0.95%, (e) 1.04% CoNi/UMCs; and (f) XRD patterns of the composites.

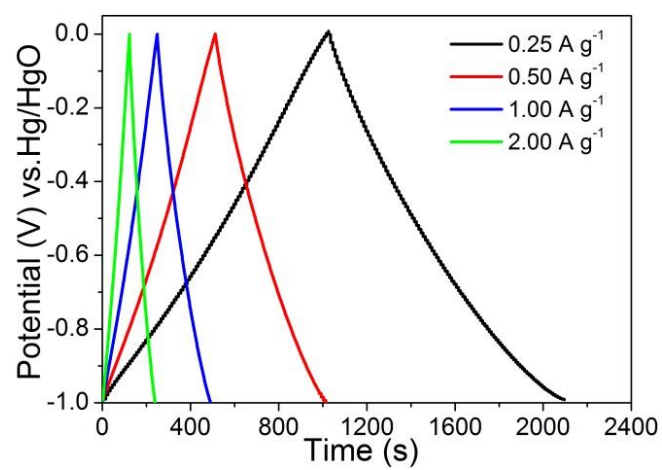

**Figure S8.** GCD curves at different current densities of 0.95% CoNi/UMCs.

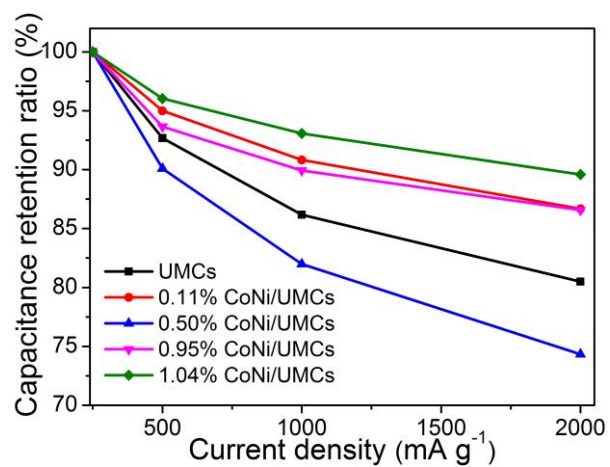

**Figure S9.** Capacitance retention ratios as a function of current densities of CoNi/UMCs composites in 6 M KOH.

## REFERENCES

- (1) Zhao, Y.; Liu, M.; Gan, L.; Ma, X.; Zhu, D.; Xu, Z.; Chen, L., Ultramicroporous Carbon Nanoparticles for the High-Performance Electrical Double-Layer Capacitor Electrode. *Energy & Fuels* **2014**, 28 (2), 1561-1568.
- (2) Xu, B.; Hou, S.; Duan, H.; Cao, G.; Chu, M.; Yang, Y., Ultramicroporous carbon as electrode material for supercapacitors. *Journal of Power Sources* **2013**, 228 (11), 193-197.
- (3) Yun, Y. S.; Lee, S.; Kim, N. R.; Kang, M.; Leal, C.; Park, K. Y.; Kang, K.; Jin, H. J., High and rapid alkali cation storage in ultramicroporous carbonaceous materials. *Journal of Power Sources* **2016**, 313, 142-151.
- (4) Liu, M.; Qian, J.; Zhao, Y.; Zhu, D.; Gan, L.; Chen, L., Core-shell ultramicroporous@microporous carbon nanospheres as advanced supercapacitor electrodes. *Journal of Materials Chemistry A* **2015**, 3 (21), 11517-11526.
- (5) Jiang, H. L.; Liu, B.; Lan, Y. Q.; Kuratani, K.; Akita, T.; Shioyama, H.; Zong, F.; Xu, Q., From metal-organic framework to nanoporous carbon: toward a very high surface area and hydrogen uptake. *Journal of the American Chemical Society* **2011**, 133 (31), 11854-7.
- (6) Liu, B.; Shioyama, H.; Akita, T.; Xu, Q., Metal-organic framework as a template for porous carbon synthesis. *Journal of the American Chemical Society* **2008**, 130 (16), 5390-1.
- (7) Luo, H.; Zheng, L.; Lei, L.; Zhang, D.; Wu, J.; Yang, J., Supercapacitive behavior of mesoporous carbon CMK-3 in calcium nitrate aqueous electrolyte. *Korean Journal of Chemical Engineering* **2014**, 31 (4), 712-718.
- (8) Lv, Y.; Zhang, F.; Dou, Y.; Zhai, Y.; Wang, J.; Liu, H.; Xia, Y.; Tu, B.; Zhao, D., A comprehensive study on KOH activation of ordered mesoporous carbons and their supercapacitor application. *Journal of Materials Chemistry* **2011**, 22 (1), 93-99.
- (9) Li, Q.; Jiang, R.; Dou, Y.; Wu, Z.; Huang, T.; Feng, D.; Yang, J.; Yu, A.; Zhao, D., Synthesis of mesoporous carbon spheres with a hierarchical pore structure for the electrochemical double-layer capacitor. *Carbon* **2011**, 49 (4), 1248-1257.
- (10) Yang, Y.; Hao, S.; Zhao, H.; Wang, Y.; Zhang, X., Hierarchically porous carbons derived from nonporous metal-organic frameworks: Synthesis and influence of struts. *Electrochimica Acta* **2015**, 180, 651-657.
